# Supplementary material for: Incidence and Temporal Changes in Lumbar Degeneration and Low Back Pain in Child and Adolescent Weightlifters: Prospective 5-Year Cohort Study
Source: Research Square preprint supplement (doi:10.21203/rs.3.rs-533539/v1), 2021-05-20
Supplement: Supplementary file 1 [file 51b1cd549b41ab7001efd811.xlsx]

## Sheet: Sheet1
		2014	2015	2016	2017	2018
	Lumbar disc degeneration	0	7	9	11	11
	Lumbar disc herniation	0	0	2	3	4
	Lumbar spondylolysis	0	1	4	1	0
	Presence of low back pain	0	1	3	2	2
