# Supplementary material for: Incidence and Temporal Changes in Lumbar Degeneration and Low Back Pain in Child and Adolescent Weightlifters: Prospective 5-Year Cohort Study
Source: Research Square preprint supplement (doi:10.21203/rs.3.rs-533539/v1), 2021-05-20
Supplement: Supplementary file 2 [file bc6567aef81418df73449b3d.xlsx]

## Sheet: Sheet1
	Pfirrmann classification	grade 1	grade 2	grade 3	grade 4
	L1/2	6	4	1	1
	L2/3	6	5	1	0
	L3/4	8	3	1	0
	L4/5	4	4	1	3
	L5/S1	4	5	1	2
